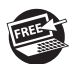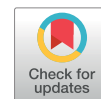

COMMENT ON YOUNG-HYMAN ET AL.

## Psychosocial Care for People With Diabetes: A Position Statement of the American Diabetes Association. *Diabetes Care* 2016;39:2126–2140

*Diabetes Care* 2018;41:e31–e32 | <https://doi.org/10.2337/dc17-1102>

Frank J. Snoek,<sup>1,2</sup> Norbert Hermanns,<sup>3</sup> Maartje de Wit,<sup>1</sup> Jörg Huber,<sup>4</sup> Jackie Sturt,<sup>5</sup> François Pouwer,<sup>6</sup> Cathy E. Lloyd,<sup>7</sup> Ingrid Willaing,<sup>8</sup> and Arie Nouwen,<sup>9</sup> on behalf of the Psychosocial Aspects of Diabetes Study Group of the European Association for the Study of Diabetes

We read with great interest the American Diabetes Association's position statement on psychosocial care for people with diabetes by Young-Hyman et al. (1). This statement complements previous international guidelines, including those of the International Society for Pediatric and Adolescent Diabetes and the International Diabetes Federation (2,3), underscoring the importance of psychosocial care in the context of diabetes management. We commend the authors for their efforts to offer a comprehensive overview of psychosocial problems that warrant our attention along with a set of evidence-based recommendations. There are two issues that in our view deserve more attention.

First, although the authors acknowledge that psychological well-being is an important outcome of diabetes care, the recommendations are all focused on mental ill health. It is important to recognize that the absence of a (serious) mental health problem does not necessarily equate to well-being or good "quality of life." This has repercussions for language and communication with the person with diabetes. We feel it is important to adopt a positive, affirmative approach to the psychosocial needs of the person with

diabetes. If we want all diabetes care providers to deliver emotionally informed care, we should avoid overpathologizing the experiences of individuals with diabetes into ill health states as opposed to well-being states. In essence, the first question (to all individuals with diabetes) should be "How well are you doing?" rather than a screening question for an eating disorder, depression, or other psychopathology. We recommend including a positively framed measure of emotional well-being in routine assessment (e.g., World Health Organization Well-Being Index [WHO-5]) either as a first step or alongside a measure of emotional distress. There is real-world evidence demonstrating the acceptability and effectiveness of such an approach (4).

Second, and related to the previous point, the practice of screening deserves more thought, particularly with respect to patient acceptance. We should be aware that from the perspective of the person with diabetes, screening for psychopathology is not always welcomed, for example, because of fear of stigmatization or low confidence in mental health services (5), and more so when screening becomes a routine procedure of simply "ticking the box." Also, a questionnaire

score indicative of a mental health problem is not to be confused with a felt need for psychological care. Too often people with diabetes report high distress but do not express a need for professional help. Asking the question "Do you want support for these problems, professionally or otherwise?" is just as important as knowing whether a person is distressed. It is therefore imperative that if screening is applied as recommended by Young-Hyman et al. (1), then diabetes health care teams are trained to do so in a constructive, patient-friendly manner and are able to make available culturally acceptable, affordable evidence-based treatment options in response to the identified psychosocial needs. We suggest putting more emphasis on these requirements when recommending screening for psychosocial problems as part of routine diabetes care.

**Duality of Interest.** J.S. undertakes consultancy for Eli Lilly and is a member of its education board. No other potential conflicts of interest relevant to this article were reported.

### References

1. Young-Hyman D, de Groot M, Hill-Briggs F, Gonzalez JS, Hood K, Peyrot M. Psychosocial

<sup>1</sup>Department of Medical Psychology, VU University Medical Center, Amsterdam, the Netherlands

<sup>2</sup>Department of Medical Psychology, Academic Medical Center, Amsterdam, the Netherlands

<sup>3</sup>Research Institute of the Diabetes Academy Mergentheim, Bad Mergentheim, Germany

<sup>4</sup>School of Health Sciences, University of Brighton, Brighton, U.K.

<sup>5</sup>Florence Nightingale Faculty of Nursing & Midwifery, King's College London, London, U.K.

<sup>6</sup>Department of Psychology, University of Southern Denmark, Odense, Denmark

<sup>7</sup>Faculty of Wellbeing, Education and Language Studies, The Open University, Milton Keynes, U.K.

<sup>8</sup>Diabetes Management Research, Steno Diabetes Center, Copenhagen, Denmark

<sup>9</sup>Department of Psychology, Middlesex University, London, U.K.

Corresponding author: Arie Nouwen, [a.nouwen@mdx.ac.uk](mailto:a.nouwen@mdx.ac.uk).

© 2018 by the American Diabetes Association. Readers may use this article as long as the work is properly cited, the use is educational and not for profit, and the work is not altered. More information is available at <http://www.diabetesjournals.org/content/license>.

care for people with diabetes: a position statement of the American Diabetes Association. *Diabetes Care* 2016;39:2126–2140

2. Delamater AM, de Wit M, McDarby V, Malik J, Acerini CL; International Society for Pediatric and Adolescent Diabetes. ISPAD clinical practice consensus guidelines 2014. Psychological care of children and adolescents with type 1 diabetes. *Pediatr Diabetes* 2014;15(Suppl. 20): 232–244
3. IDF Clinical Guidelines Task Force. Global guideline for type 2 diabetes: recommendations for standard, comprehensive, and minimal care. *Diabet Med* 2006;23:579–593
4. Snoek FJ, Kersch NY, Eldrup E, et al. Monitoring of Individual Needs in Diabetes (MIND)-2: follow-up data from the cross-national Diabetes Attitudes, Wishes, and Needs (DAWN) MIND study. *Diabetes Care* 2012;35:2128–2132
5. Wittkamp KA, van Zwieten M, Smits FT, Schene AH, Huyser J, van Weert HC. Patients' view on screening for depression in general practice. *Fam Pract* 2008;25:438–444
